# Supplementary material
Source: MDPI journal article supplement (https://www.mdpi.com/2673-7523/1/2/10)
Supplement: s1 [file s1]

# Pre-Treatment C-Reactive Protein Predicts Survival in Small Cell Lung Cancer Patients

Anne Marie Stensvold, Ninna Aggerholm-Pedersen, Anne Winther-Larsen and Birgitte Sandfeld-Paulsen

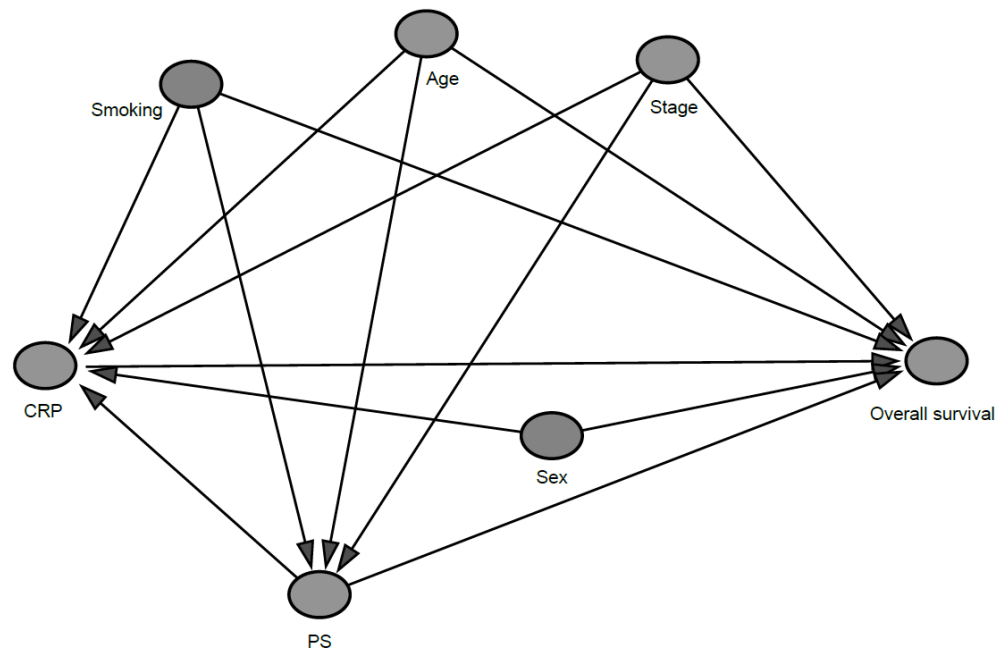

**Figure S1.** Visualization of the directed acyclic graph (DAG) identifying confounders of CRPs effect on overall survival.

**Table S1.** Patient Characteristics of included and excluded patients (N=1,316)

|                                             | Included patients | Excluded patients | <i>P</i> -value |
|---------------------------------------------|-------------------|-------------------|-----------------|
| <b>Total</b>                                | 923 (70%)         | 389 (30%)         |                 |
| <b>Age</b> , median years (95% percentiles) | 70 (52-83)        | 69 (53-83)        | 0.15            |
| <b>Sex</b>                                  |                   |                   | 0.03            |
| Female                                      | 465 (50%)         | 152 (43%)         |                 |
| Male                                        | 458 (50%)         | 200 (57%)         |                 |
| <b>Stage</b>                                |                   |                   | 0.16            |
| I                                           | 47 (5%)           | 11 (3%)           |                 |
| II                                          | 20 (2%)           | 8 (2%)            |                 |
| III                                         | 225 (24%)         | 103 (29%)         |                 |
| IV                                          | 548 (59%)         | 211 (60%)         |                 |
| Unknown                                     | 83 (9%)           | 19 (6%)           |                 |
| <b>Performance stage, ECOG</b>              |                   |                   | 0.02            |
| 0                                           | 213 (23%)         | 101 (29%)         |                 |
| 1                                           | 291 (32%)         | 121 (34%)         |                 |
| 2                                           | 149 (16%)         | 52 (15%)          |                 |
| 3                                           | 171 (19%)         | 47 (13%)          |                 |
| Unknown                                     | 99 (11%)          | 31 (9%)           |                 |
| <b>Smoking</b>                              |                   |                   | 0.99            |
| Never                                       | 7 (< 1%)          | 3 (< 1%)          |                 |
| Former or current                           | 817 (89%)         | 354 (91%)         |                 |
| Unknown                                     | 99 (11%)          | 32 (9%)           |                 |
